# Supplementary material
Source: PubMed Central journal article supplement (PMC3059400)
Supplement: NIHMS258775-supplement-supplement_1.pdf [file NIHMS258775-supplement-supplement_1.pdf]

**Supplemental Table 1. Characteristics of Breast Cancer Cases by Use of Pre-diagnostic EPT and ET**

|                                                  | Never users<br>(n=530) |        | EPT users<br>(n=588) |        | ET users<br>(n=826) |        |
|--------------------------------------------------|------------------------|--------|----------------------|--------|---------------------|--------|
|                                                  | n                      | %      | n                    | %      | n                   | %      |
| <b>Age at diagnosis</b>                          |                        |        |                      |        |                     |        |
| 45-54                                            | 37                     | (7.0)  | 64                   | (10.9) | 44                  | (5.3)  |
| 55-64                                            | 115                    | (21.7) | 256                  | (43.5) | 227                 | (27.5) |
| 65-74                                            | 264                    | (49.8) | 234                  | (39.8) | 415                 | (50.2) |
| 75-79                                            | 114                    | (21.5) | 34                   | (5.8)  | 140                 | (16.9) |
| <b>Age at menopause</b>                          |                        |        |                      |        |                     |        |
| <45                                              | 110                    | (22.1) | 82                   | (14.5) | 250                 | (33.7) |
| 45-49                                            | 161                    | (32.4) | 191                  | (33.7) | 224                 | (30.2) |
| 50+                                              | 226                    | (45.5) | 294                  | (51.9) | 267                 | (36.0) |
| Missing                                          | 33                     |        | 21                   |        | 85                  |        |
| <b>Age at 1<sup>st</sup> full-term pregnancy</b> |                        |        |                      |        |                     |        |
| Nulliparous                                      | 55                     | (10.4) | 61                   | (10.4) | 71                  | (8.6)  |
| <30                                              | 431                    | (81.6) | 476                  | (81.2) | 686                 | (83.2) |
| 30+                                              | 42                     | (8.0)  | 49                   | (8.4)  | 68                  | (8.2)  |
| Missing                                          | 2                      |        | 2                    |        | 1                   |        |
| <b>OC use</b>                                    |                        |        |                      |        |                     |        |
| Never                                            | 382                    | (72.2) | 257                  | (43.9) | 496                 | (60.3) |
| Ever                                             | 147                    | (27.8) | 329                  | (56.1) | 327                 | (39.7) |
| Missing                                          | 1                      |        | 2                    |        | 3                   |        |
| <b>BMI</b>                                       |                        |        |                      |        |                     |        |
| <25                                              | 211                    | (40.6) | 346                  | (59.1) | 434                 | (53.1) |
| 25-<30                                           | 168                    | (32.3) | 168                  | (28.7) | 252                 | (30.8) |
| 30+                                              | 141                    | (27.1) | 71                   | (12.1) | 132                 | (16.1) |
| Missing                                          | 10                     |        | 3                    |        | 8                   |        |
| <b>Smoking</b>                                   |                        |        |                      |        |                     |        |
| Never                                            | 231                    | (43.6) | 258                  | (43.9) | 394                 | (47.8) |
| Former                                           | 207                    | (39.1) | 252                  | (42.9) | 324                 | (39.3) |
| Current                                          | 92                     | (17.4) | 78                   | (13.3) | 107                 | (13.0) |
| Missing                                          | 0                      |        | 0                    |        | 1                   |        |
| <b>Family history</b>                            |                        |        |                      |        |                     |        |
| No 1st                                           | 364                    | (74.7) | 440                  | (78.6) | 614                 | (79.3) |
| 1st deg                                          | 123                    | (25.3) | 120                  | (21.4) | 160                 | (20.7) |
| Missing                                          | 43                     |        | 28                   |        | 52                  |        |
| <b>Education</b>                                 |                        |        |                      |        |                     |        |
| Less than high school                            | 79                     | (14.9) | 23                   | (3.9)  | 67                  | (8.1)  |
| High school graduate                             | 191                    | (36.0) | 172                  | (29.3) | 296                 | (35.9) |
| Some college                                     | 179                    | (33.8) | 194                  | (33.0) | 303                 | (36.8) |
| College grad or higher                           | 81                     | (15.3) | 198                  | (33.7) | 158                 | (19.2) |
| Missing                                          | 0                      |        | 1                    |        | 2                   |        |
| <b>Income</b>                                    |                        |        |                      |        |                     |        |
| <\$15,000                                        | 115                    | (24.5) | 31                   | (5.8)  | 89                  | (12.1) |
| \$15,000-<\$25,000                               | 123                    | (26.2) | 66                   | (12.3) | 166                 | (22.5) |
| \$25,000-<\$50,000                               | 148                    | (31.5) | 224                  | (41.9) | 287                 | (38.9) |
| \$50,000+                                        | 84                     | (17.9) | 214                  | (40.0) | 195                 | (26.5) |
| Missing                                          | 60                     |        | 53                   |        | 89                  |        |
| <b>Radiation</b>                                 |                        |        |                      |        |                     |        |

|                                   |     |        |     |        |     |        |
|-----------------------------------|-----|--------|-----|--------|-----|--------|
| Never                             | 199 | (37.8) | 186 | (31.7) | 289 | (35.2) |
| Ever                              | 328 | (62.2) | 400 | (68.3) | 533 | (64.8) |
| Missing                           | 3   |        | 2   |        | 4   |        |
| <b>Chemotherapy</b>               |     |        |     |        |     |        |
| Never                             | 411 | (77.7) | 405 | (69.1) | 591 | (71.9) |
| Ever                              | 118 | (22.3) | 181 | (30.9) | 231 | (28.1) |
| Missing                           | 1   |        | 2   |        | 4   |        |
| <b>Hormone Treatment</b>          |     |        |     |        |     |        |
| Never                             | 224 | (42.8) | 180 | (31.2) | 278 | (34.2) |
| Ever                              | 299 | (57.2) | 397 | (68.8) | 535 | (65.8) |
| Missing                           | 7   |        | 11  |        | 13  |        |
| <b>Hormone Treatment</b>          |     |        |     |        |     |        |
| None                              | 224 | (42.8) | 180 | (31.2) | 278 | (34.2) |
| Aromatase inhibitors <sup>1</sup> | 42  | (8.0)  | 67  | (11.6) | 91  | (11.2) |
| Tamoxifen only (no AIs)           | 191 | (36.5) | 272 | (47.1) | 369 | (45.4) |
| Other/Unk                         | 66  | (12.6) | 58  | (10.1) | 75  | (9.2)  |
| Missing                           | 7   |        | 11  |        | 13  |        |

1. Includes women who also used Tamoxifen
